# Supplementary material for: Effects of Vine Tea Extract on Meat Quality, Gut Microbiota and Metabolome of Wenchang Broiler
Source: MDPI journal article supplement (doi:10.3390/ani12131661), 2022-06-28
Supplement: s1 [file s1]

## Supplementary materials

**Table S1** Alpha diversity indexes inter-group difference table.

| Item             | Groups |        | SEM   | <i>P</i> |
|------------------|--------|--------|-------|----------|
|                  | T1     | T3     |       |          |
| observed_species | 716.00 | 748.20 | 32.54 | 0.504    |
| shannon          | 6.95   | 6.82   | 0.17  | 0.626    |
| simpson          | 0.98   | 0.97   | 0.01  | 0.227    |
| chao1            | 821.38 | 901.17 | 43.31 | 0.229    |
| ACE              | 830.98 | 897.99 | 38.63 | 0.255    |
| goods_coverage   | 99.52  | 99.42  | 0.04  | 0.143    |

T1: the broilers were fed a basal diet; T3: the broilers were fed a basal diet supplemented with AGE at 0.4%.

**Table S2** Differential metabolites identified among T1 and T3 groups from the data set of the feces samples

| No. | Differential metabolites | Score <sup>1</sup> | RT<br>(min) | Formula                                          | <i>P</i> -Value <sup>2</sup> | Fold change <sup>2</sup> |
|-----|--------------------------|--------------------|-------------|--------------------------------------------------|------------------------------|--------------------------|
| 1   | p-cresol sulfate         | 0.48               | 0.402       | C <sub>7</sub> H <sub>8</sub> O <sub>4</sub> S   | 0.018                        | 0.22                     |
| 2   | cholesterol sulfate      | 0.66               | 0.405       | C <sub>27</sub> H <sub>46</sub> O <sub>4</sub> S | 0.049                        | 0.53                     |

1) The values were the degree of secondary spectrum (MS<sup>2</sup>) matching between the analytical compounds of base peak intensity chromatogram and an in-house MS<sup>2</sup> database (Biotree DB, Shanghai, China) in positive ion mode. The property of the value is between [0,1], and the larger the value, the higher the matching.

2) Upregulation ( $p < 0.05$ , FC > 1.10); Downregulation ( $p < 0.05$ , FC < 0.90).

**Table S3** MS data and identification of dihydromyricetin metabolites in broiler feces.

| Name | RT<br>(min) | Ion<br>mode <sup>1</sup> | Metabolic pathway                                       | Formula                                             | Fragment ions                 |
|------|-------------|--------------------------|---------------------------------------------------------|-----------------------------------------------------|-------------------------------|
| M1   | 1.004       | [M-H]                    | Dehydration,<br>Reduction                               | C <sub>15</sub> H <sub>12</sub> O <sub>7</sub>      | 125.02383,151.03963,177.01920 |
| M2   | 3.174       | [M-H]                    | Dehydration,<br>Nitro Reduction,<br>Glycine Conjugation | C <sub>17</sub> H <sub>15</sub> N<br>O <sub>6</sub> | 190.01439,166.04994,117.03430 |
| M3   | 3.409       | [M-H]                    | Nitro Reduction,<br>Acetylation                         | C <sub>17</sub> H <sub>18</sub> O <sub>5</sub>      | 257.11786, 185.09554,93.03414 |

**Table S4** MS data and identification of myricetin metabolites in broiler feces.

| Name | RT(min) | Ion<br>mode <sup>1</sup> | Metabolic pathway               | Formula                                        | Fragment ions                 |
|------|---------|--------------------------|---------------------------------|------------------------------------------------|-------------------------------|
| M1   | 1.004   | [M-H]                    | Nitro<br>reduction<br>oxidation | C <sub>15</sub> H <sub>12</sub> O <sub>7</sub> | 125.02383,151.03963,178.99844 |
| M4   | 3.636   | [M-H]                    | Nitro reduction,<br>methylation | C <sub>16</sub> H <sub>12</sub> O <sub>6</sub> | 255.06613,135.00806,119.04892 |
| M5   | 0.871   | [M+H]                    | Nitro reduction,<br>methylation | C <sub>16</sub> H <sub>16</sub> O <sub>4</sub> | 229.08534,147.04385           |

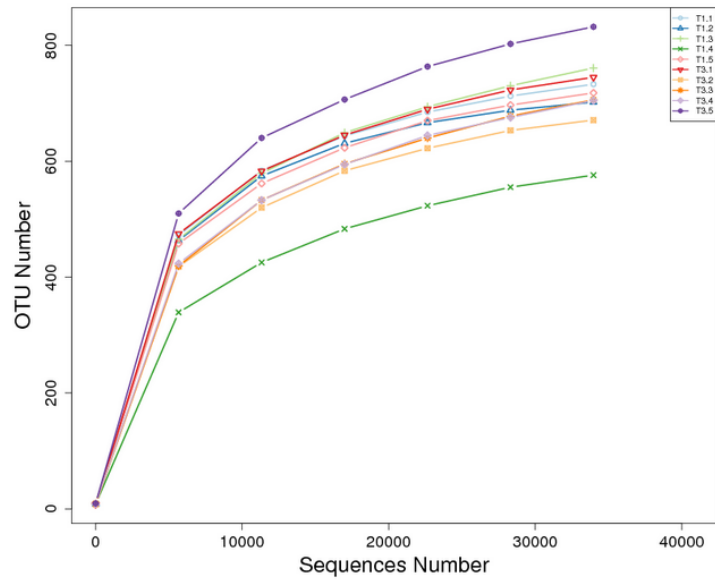

**Figure S1** Dilution curves

T1: the broilers were fed a basal diet; T3: the broilers were fed a basal diet supplemented with AGE at 0.4%.

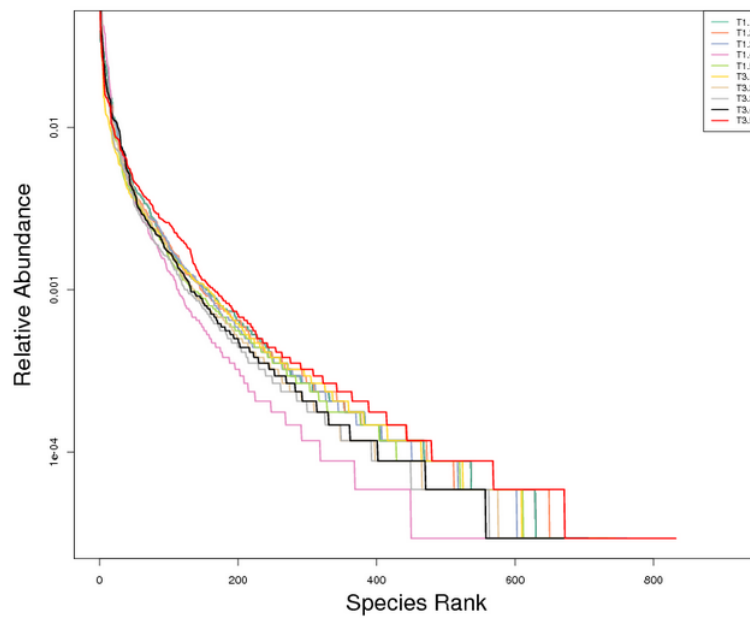

**Figure S2** Rank abundance curves

T1: the broilers were fed a basal diet; T3: the broilers were fed a basal diet supplemented with AGE at 0.4%.

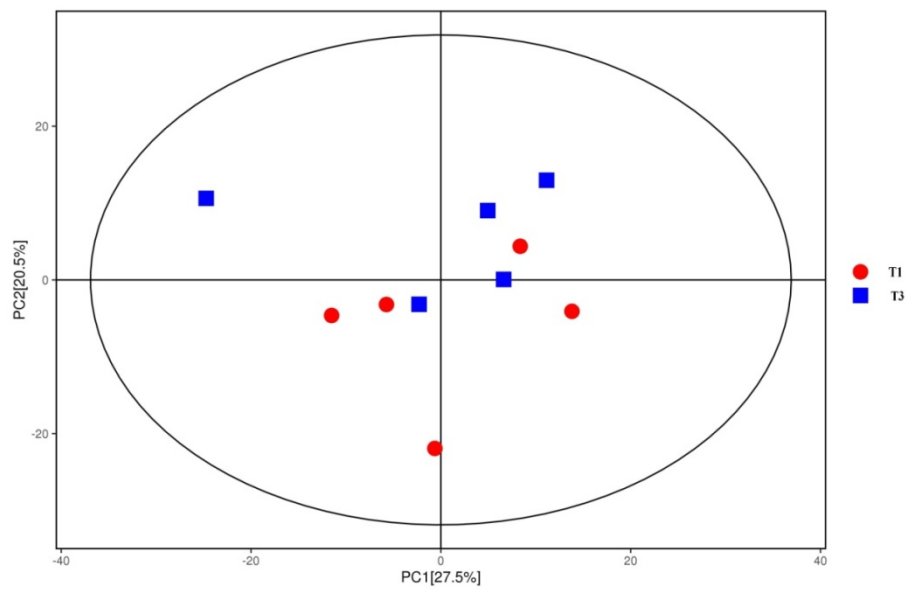

**Figure S3** PCA score plot.

T1: the broilers were fed a basal diet; T3: the broilers were fed a basal diet supplemented with AGE at 0.4%.

# A PLS-DA scores

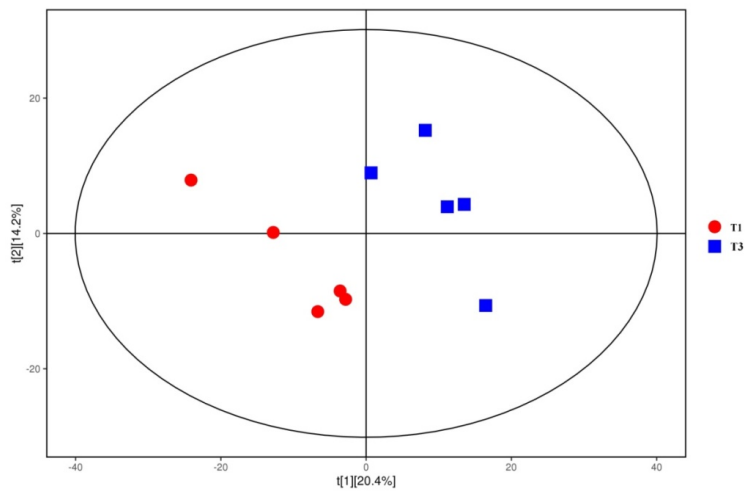

# B PLS-DA permutation

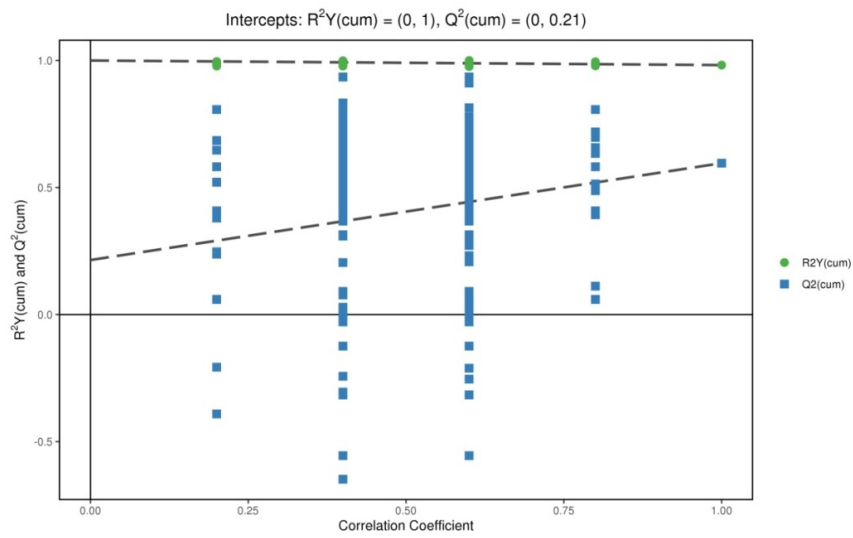

**Figure S4** PLS-DA analysis.

A) PLS-DA scores: The abscissa represents the first principal component PC1, and the ordinate represents the second principal component PC2. T1: the broilers were fed a basal diet; T3: the broilers were fed a basal diet supplemented with AGE at 0.4%.

B) Permutation diagram:  $R^2$  stands for model verification, and the Y matrix of original classification and  $N$  times of different arrangement are linearly regressed with  $R^2Y$  and  $Q^2Y$ , and the intercept values of regression line and y-axis are  $R^2$  and  $Q^2$ , respectively; used to measure whether the model is over-fitted.
